# Supplementary material for: Receptor protein tyrosine phosphatase beta/zeta is a functional binding partner for vascular endothelial growth factor
Source: PubMed Central journal article supplement (PMC4323219; doi:10.1186/s12943-015-0287-3), 2015-02-03
Supplement: 12943_2015_287_MOESM2_ESM.pdf [file 12943_2015_287_MOESM2_ESM.pdf]

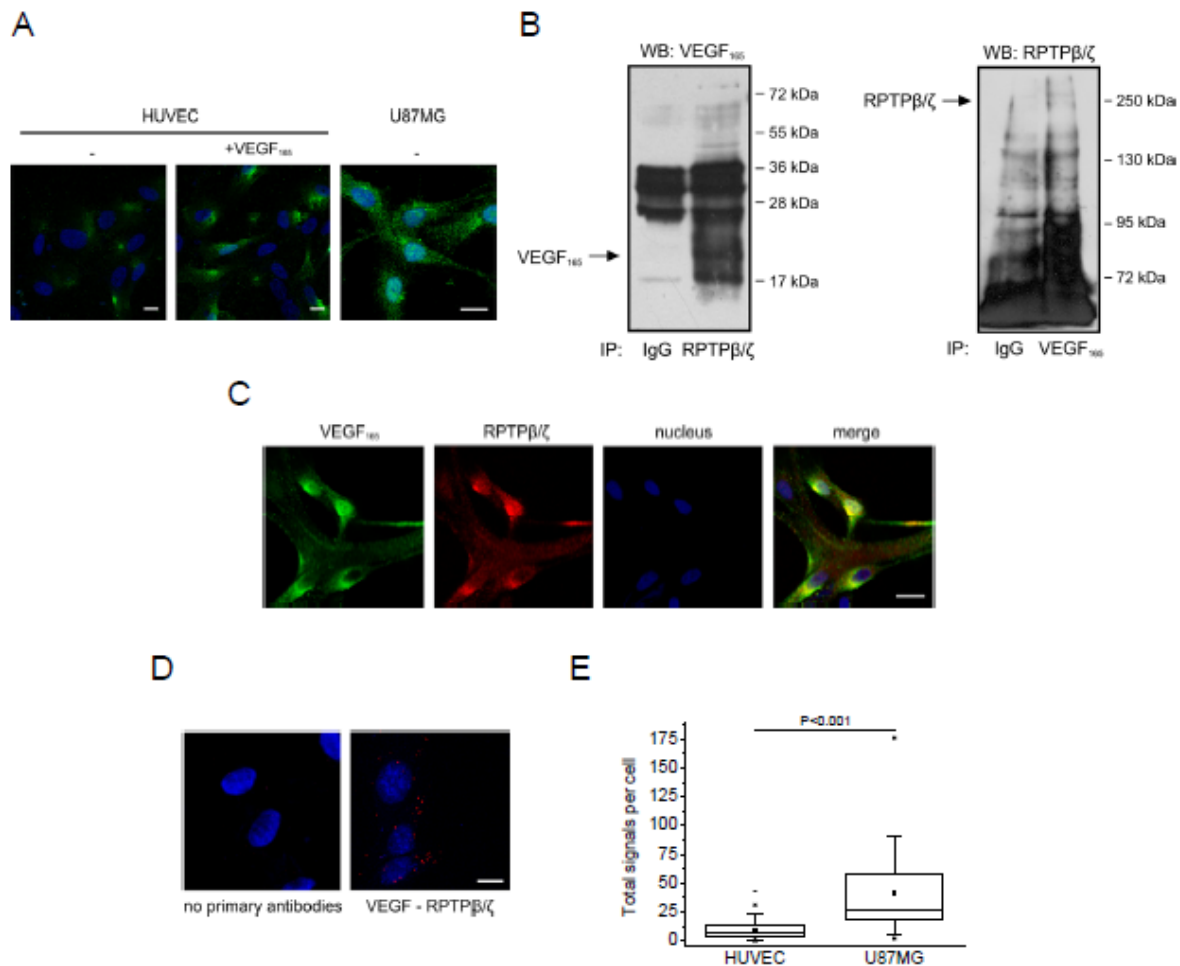

**Additional file 2. VEGF-RPTPβ/ζ interaction in human glioma U87MG cells.** (A) Immunofluorescence images of HUVEC and U87MG cells stained for VEGF<sub>165</sub> (green) and nucleus (blue). Representative pictures from three and two independent experiments respectively. (B) U87MG cell lysates were immunoprecipitated for RPTPβ/ζ or VEGF<sub>165</sub>. Immunoprecipitates were analyzed by Western blot for the presence of VEGF<sub>165</sub> or RPTPβ/ζ, respectively. IgG was used as a negative control. Representative blots from two independent experiments. (C) Immunofluorescence images of U87MG cells stained for VEGF<sub>165</sub> (green), RPTPβ/ζ (red) and nucleus (blue). Representative pictures from two independent experiments. (D) *In situ* PLA signals were detected as red dots, indicating the direct formation of VEGF<sub>165</sub>-RPTPβ/ζ complexes. Representative pictures from three independent experiments. Scale bars in A, C and D correspond to 10 μm. (E) Formation of VEGF-RPTPβ/ζ complexes as evidenced by *in situ* PLA in HUVEC and U87MG cells. The box plots indicate the median, mean and range of the detected signals (n > 20 image fields with 4-6 cells per image per sample type, each sample run in duplicate) from four independent experiments.
