# Supplementary material for: Receptor protein tyrosine phosphatase beta/zeta is a functional binding partner for vascular endothelial growth factor
Source: PubMed Central journal article supplement (PMC4323219; doi:10.1186/s12943-015-0287-3), 2015-02-03
Supplement: 12943_2015_287_MOESM3_ESM.pdf [file 12943_2015_287_MOESM3_ESM.pdf]

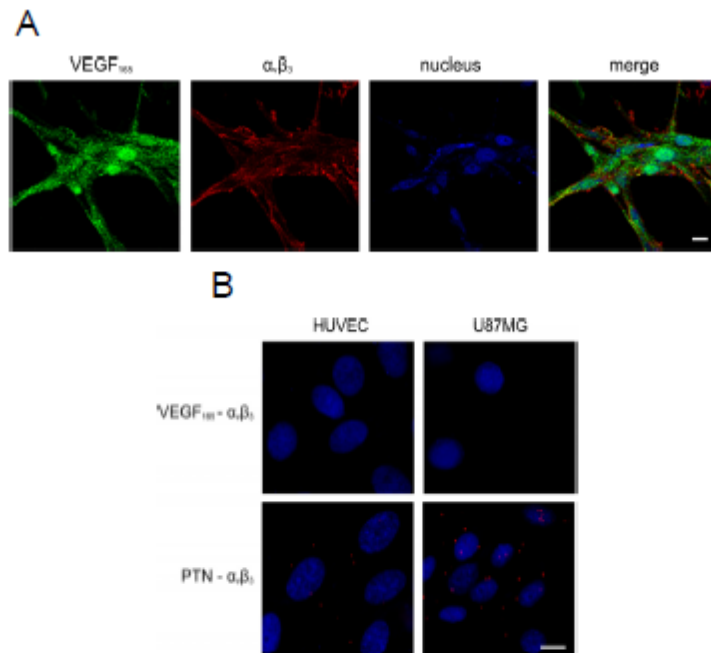

**Additional file 3. VEGF<sub>165</sub> does not interact with  $\alpha_5\beta_3$ .** (A) Immunofluorescence images of U87MG cells cultured in serum-containing medium and stained for VEGF<sub>165</sub> (green),  $\alpha_5\beta_3$  (red) and nucleus (blue). Representative pictures from two independent experiments. (B) The absence of *in situ* PLA signals indicates lack of the VEGF<sub>165</sub>- $\alpha_5\beta_3$  direct interaction in both HUVEC and U87MG cells. The PTN- $\alpha_5\beta_3$  interaction in both types of cells was used as a positive control. Representative pictures from two independent experiments.
