# Supplementary material for: Receptor protein tyrosine phosphatase beta/zeta is a functional binding partner for vascular endothelial growth factor
Source: PubMed Central journal article supplement (PMC4323219; doi:10.1186/s12943-015-0287-3), 2015-02-03
Supplement: 12943_2015_287_MOESM4_ESM.pdf [file 12943_2015_287_MOESM4_ESM.pdf]

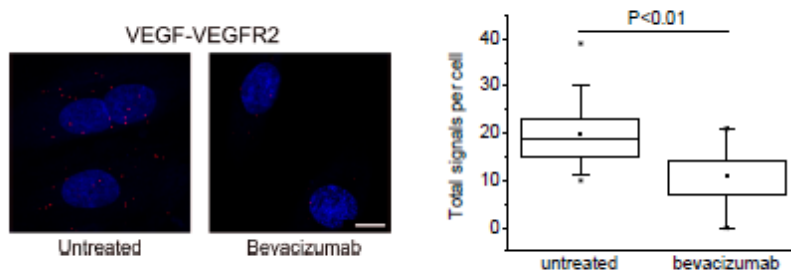

Additional file 4. Bevacizumab inhibits VEGF-VEGFR2 interaction. Formation of VEGF-VEGFR2 complexes as evidenced by *in situ* PLA in HUVEC in the absence or the presence of bevacizumab (250  $\mu\text{g}/\text{ml}$ ). The box plots indicate the median, mean and range of the detected signals ( $n > 20$  image fields with  $\sim 4$  cells per image per sample type, each sample run at least in duplicate) from two independent experiments. Scale bars in all cases correspond to 10  $\mu\text{m}$ .
