# Supplementary material for: Receptor protein tyrosine phosphatase beta/zeta is a functional binding partner for vascular endothelial growth factor
Source: PubMed Central journal article supplement (PMC4323219; doi:10.1186/s12943-015-0287-3), 2015-02-03
Supplement: 12943_2015_287_MOESM7_ESM.pdf [file 12943_2015_287_MOESM7_ESM.pdf]

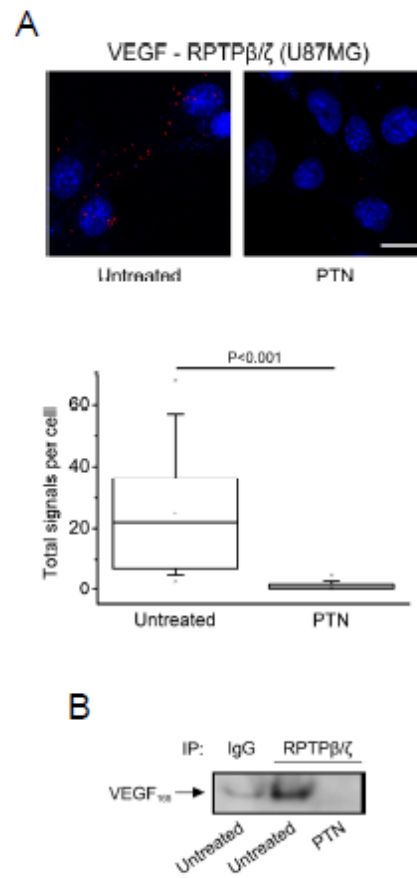

**Additional file 7. PTN inhibits VEGF-RPTPβ/ζ interaction in U87MG cells. (A)** Formation of VEGF-RPTPβ/ζ complexes as evidenced by *in situ* PLA in U87MG cells in the absence or presence of PTN (100 ng/ml). The box plots indicate the median, mean and range of the detected signals (n = 6 image fields with ~ 5 cells per image per sample type, each sample run in duplicate). Scale bar corresponds to 10 μm. Data come from three independent experiments. **(B)** Cell lysates were immunoprecipitated for RPTPβ/ζ. Immunoprecipitates were analyzed by Western blot for the presence of VEGF. IgG was used as a negative control. Representative blots from two independent experiments.
